# Supplementary material for: All-Trans Retinoic Acid Attenuates Fibrotic Processes by Downregulating TGF-β1/Smad3 in Early Diabetic Nephropathy
Source: MDPI journal article supplement (doi:10.3390/biom9100525), 2019-09-25
Supplement: s1 [file s1]

# All-Trans Retinoic Acid Attenuates Fibrotic Processes by Downregulating TGF- $\beta$ 1/Smad3 in Early Diabetic Nephropathy

Edith Sierra-Mondragon <sup>1</sup>, Rafael Rodríguez-Muñoz <sup>1</sup>, Carmen Namorado-Tonix <sup>1</sup>, Eduardo Molina-Jijon <sup>2</sup>, Daniel Romero-Trejo <sup>3</sup>, Jose Pedraza-Chaverri <sup>4</sup>, and Jose L-Reyes <sup>1,\*</sup>

## Supplementary Materials:

a)

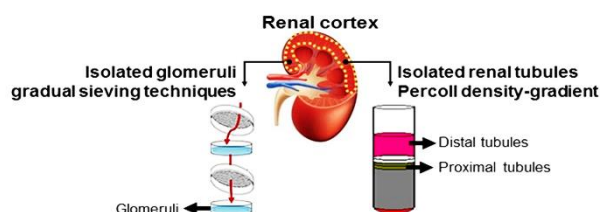

b)

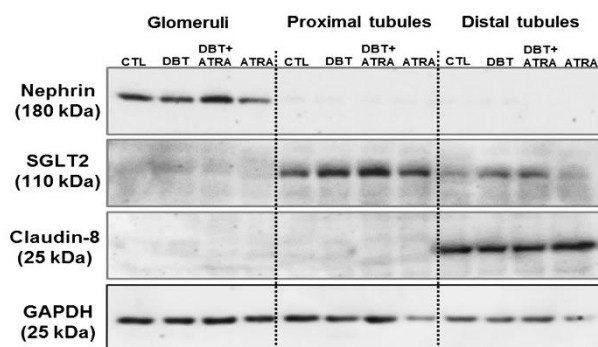

Figure S1. Enrichment of nephron sections. (a) Experimental procedure to isolate nephron segments from renal cortex as described in Methods section. (b) Specific markers of glomeruli (nephrin), proximal tubules (sodium glucose transporter 2, SGLT2), and distal tubules (claudin-8). Glyceraldehyde 3 phosphate dehydrogenase (GAPDH) was used as loading control. CTL = Control group, DTB = Diabetic group, DBT+ATRA = Diabetic rats treated with all-trans retinoic acid, ATRA = Control animals treated with all-trans retinoic acid.
